# Supplementary material for: Compensation or Displacement of Physical Activity in Children and Adolescents: A Systematic Review of Empirical Studies
Source: MDPI journal article supplement (doi:10.3390/children9030351), 2022-03-03
Supplement: s1 [file s1]

**Table S2:** Quality Assessment of included studies

| <i>Study</i>  | <i>Question / objective sufficiently described?</i> | <i>Study design evident and appropriate?</i> | <i>Method of subject/comparison group selection or source of information/input variables described and appropriate?</i> | <i>Subject (and comparison group, if applicable) characteristics sufficiently described?</i> | <i>If interventional and random allocation was possible, was it described?</i> | <i>If interventional and blinding of investigators was possible, was it reported?</i> | <i>If interventional and blinding of subjects was possible, was it reported?</i> | <i>Outcome and (if applicable) exposure measure(s) well defined and robust to measurement / misclassification bias? Means of assessment reported?</i> | <i>Sample size appropriate?</i> | <i>analytic methods described/justified and appropriate?</i> | <i>Some estimate of variance is reported for the main results?</i> | <i>Controlled for confounding?</i> | <i>Results reported in sufficient detail?</i> | <i>Conclusion supported by results</i> | <i>Summary score (total sum / total possible sum)</i> |
|---------------|-----------------------------------------------------|----------------------------------------------|-------------------------------------------------------------------------------------------------------------------------|----------------------------------------------------------------------------------------------|--------------------------------------------------------------------------------|---------------------------------------------------------------------------------------|----------------------------------------------------------------------------------|-------------------------------------------------------------------------------------------------------------------------------------------------------|---------------------------------|--------------------------------------------------------------|--------------------------------------------------------------------|------------------------------------|-----------------------------------------------|----------------------------------------|-------------------------------------------------------|
| Abuerto 2011  | 1                                                   | 2                                            | 2                                                                                                                       | 2                                                                                            | 2                                                                              | 1                                                                                     | 1                                                                                | 2                                                                                                                                                     | 2                               | 2                                                            | 2                                                                  | 2                                  | 2                                             | 2                                      | 0.89                                                  |
| Adamo 2017    | 2                                                   | 2                                            | 2                                                                                                                       | 2                                                                                            | 1                                                                              | 2                                                                                     | 0                                                                                | 2                                                                                                                                                     | 2                               | 2                                                            | 2                                                                  | 2                                  | 2                                             | 1                                      | 0.86                                                  |
| Adkins 2013   | 1                                                   | 2                                            | 1                                                                                                                       | 2                                                                                            | 1                                                                              | 0                                                                                     | 0                                                                                | 2                                                                                                                                                     | 1                               | 2                                                            | 1                                                                  | 1                                  | 1                                             | 1                                      | 0.57                                                  |
| Alderman 2012 | 2                                                   | 2                                            | 2                                                                                                                       | 2                                                                                            | n/a                                                                            | n/a                                                                                   | n/a                                                                              | 2                                                                                                                                                     | 2                               | 2                                                            | 1                                                                  | 2                                  | 2                                             | 2                                      | 0.95                                                  |
| Alhassan 2007 | 2                                                   | 2                                            | 2                                                                                                                       | 1                                                                                            | 1                                                                              | 0                                                                                     | 0                                                                                | 2                                                                                                                                                     | 1                               | 2                                                            | 1                                                                  | 2                                  | 1                                             | 2                                      | 0.68                                                  |
| Alhassan 2012 | 1                                                   | 2                                            | 2                                                                                                                       | 2                                                                                            | 1                                                                              | 0                                                                                     | 0                                                                                | 2                                                                                                                                                     | 1                               | 2                                                            | 2                                                                  | 2                                  | 2                                             | 2                                      | 0.75                                                  |
| Alhassan 2013 | 2                                                   | 2                                            | 1                                                                                                                       | 1                                                                                            | 1                                                                              | 0                                                                                     | 0                                                                                | 2                                                                                                                                                     | 2                               | 2                                                            | 1                                                                  | 2                                  | 2                                             | 2                                      | 0.71                                                  |
| Alhassan 2016 | 2                                                   | 2                                            | 2                                                                                                                       | 2                                                                                            | 2                                                                              | 0                                                                                     | 0                                                                                | 2                                                                                                                                                     | 2                               | 2                                                            | 1                                                                  | 1                                  | 2                                             | 2                                      | 0.79                                                  |
| Alhassan 2018 | 1                                                   | 2                                            | 2                                                                                                                       | 1                                                                                            | 1                                                                              | 0                                                                                     | 0                                                                                | 2                                                                                                                                                     | 2                               | 2                                                            | 2                                                                  | 1                                  | 2                                             | 2                                      | 0.71                                                  |
| Aljuhani 2019 | 2                                                   | 2                                            | 2                                                                                                                       | 2                                                                                            | n/a                                                                            | n/a                                                                                   | n/a                                                                              | 2                                                                                                                                                     | 2                               | 2                                                            | 2                                                                  | 2                                  | 2                                             | 2                                      | 1.00                                                  |

|                     |   |   |   |   |     |     |     |   |   |   |   |   |   |   |      |
|---------------------|---|---|---|---|-----|-----|-----|---|---|---|---|---|---|---|------|
| Baggett 2010        | 2 | 2 | 2 | 2 | n/a | n/a | n/a | 2 | 2 | 2 | 2 | 2 | 2 | 2 | 1.00 |
| Bin Tan 2018        | 2 | 2 | 1 | 1 | n/a | n/a | n/a | 2 | 2 | 2 | 2 | 2 | 2 | 2 | 0.91 |
| Bringolf Isler 2009 | 2 | 2 | 2 | 2 | n/a | n/a | n/a | 2 | 2 | 2 | 2 | 2 | 2 | 2 | 1.00 |
| Brockman 2010       | 1 | 2 | 2 | 1 | n/a | n/a | n/a | 2 | 2 | 2 | 2 | 2 | 1 | 1 | 0.82 |
| Brusseau 2011       | 2 | 2 | 2 | 1 | n/a | n/a | n/a | 2 | 2 | 2 | 1 | 1 | 2 | 2 | 0.86 |
| Carlson 2017        | 2 | 2 | 2 | 2 | n/a | n/a | n/a | 2 | 2 | 2 | 1 | 2 | 2 | 2 | 0.95 |
| Cheung 2019         | 2 | 2 | 2 | 2 | n/a | n/a | n/a | 2 | 2 | 2 | 1 | 1 | 2 | 2 | 0.91 |
| Coombes 2016        | 2 | 2 | 2 | 1 | n/a | n/a | n/a | 2 | 2 | 2 | 2 | 2 | 2 | 2 | 0.95 |
| Cooper 2003         | 1 | 2 | 2 | 2 | n/a | n/a | n/a | 1 | 2 | 1 | 1 | 1 | 2 | 2 | 0.77 |
| Dale 2000           | 2 | 2 | 2 | 1 | n/a | n/a | n/a | 2 | 2 | 2 | 1 | 1 | 1 | 1 | 0.77 |
| Eyre 2015           | 2 | 2 | 1 | 1 | n/a | n/a | n/a | 2 | 2 | 2 | 2 | 2 | 1 | 2 | 0.86 |
| Ford 2007           | 1 | 2 | 2 | 2 | n/a | n/a | n/a | 2 | 2 | 2 | 2 | 2 | 2 | 2 | 0.95 |
| Fremaux 2011        | 1 | 2 | 2 | 2 | n/a | n/a | n/a | 2 | 1 | 2 | 1 | 2 | 2 | 1 | 0.82 |
| Frömel 2012         | 2 | 2 | 2 | 2 | n/a | n/a | n/a | 2 | 2 | 2 | 2 | 1 | 2 | 2 | 0.95 |
| Gao 2015            | 2 | 2 | 2 | 2 | n/a | n/a | n/a | 1 | 1 | 2 | 1 | 1 | 2 | 2 | 0.82 |
| Gidlow 2008         | 1 | 2 | 2 | 2 | n/a | n/a | n/a | 2 | 2 | 2 | 1 | 1 | 2 | 2 | 0.86 |
| Goodman 2011        | 1 | 2 | 2 | 2 | n/a | n/a | n/a | 2 | 2 | 2 | 1 | 2 | 2 | 2 | 0.91 |
| Grasten 2015        | 2 | 2 | 2 | 1 | n/a | n/a | n/a | 2 | 2 | 2 | 1 | 2 | 2 | 2 | 0.91 |
| Grasten 2015b       | 2 | 2 | 2 | 1 | n/a | n/a | n/a | 2 | 2 | 2 | 1 | 2 | 2 | 2 | 0.91 |
| Groffik 2020        | 2 | 2 | 2 | 2 | n/a | n/a | n/a | 2 | 2 | 2 | 2 | 2 | 2 | 2 | 1.00 |
| Haapala 2016        | 2 | 2 | 2 | 2 | n/a | n/a | n/a | 2 | 2 | 2 | 1 | 0 | 2 | 2 | 0.86 |
| Hardman 2009        | 1 | 2 | 2 | 2 | n/a | n/a | n/a | 2 | 2 | 2 | 1 | 2 | 1 | 1 | 0.82 |
| Harrington 2018     | 2 | 2 | 2 | 2 | 2   | 2   | 0   | 2 | 2 | 2 | 2 | 1 | 2 | 2 | 0.89 |
| Herman 2014         | 2 | 2 | 2 | 2 | n/a | n/a | n/a | 2 | 2 | 2 | 2 | 2 | 2 | 2 | 1.00 |
| Jago 2014           | 2 | 2 | 2 | 2 | n/a | n/a | n/a | 2 | 2 | 2 | 2 | 2 | 2 | 2 | 1.00 |

|                   |   |   |   |   |     |     |     |   |   |   |   |   |   |   |      |
|-------------------|---|---|---|---|-----|-----|-----|---|---|---|---|---|---|---|------|
| Jago 2017         | 2 | 2 | 2 | 2 | n/a | n/a | n/a | 2 | 2 | 2 | 2 | 2 | 2 | 2 | 1.00 |
| Kek 2019          | 2 | 2 | 1 | 2 | n/a | n/a | n/a | 1 | 2 | 2 | 1 | 2 | 2 | 2 | 0.86 |
| Kidokoro 2019     | 2 | 2 | 2 | 2 | n/a | n/a | n/a | 2 | 2 | 2 | 1 | 1 | 2 | 2 | 0.91 |
| Kippe 2018        | 2 | 2 | 2 | 1 | n/a | n/a | n/a | 2 | 2 | 2 | 1 | 2 | 2 | 2 | 0.91 |
| Kobel 2017        | 2 | 2 | 2 | 2 | n/a | n/a | n/a | 2 | 2 | 2 | 1 | 1 | 2 | 2 | 0.91 |
| Koorts 2019       | 2 | 2 | 2 | 2 | n/a | n/a | n/a | 2 | 2 | 2 | 1 | 2 | 1 | 2 | 0.91 |
| Long 2013         | 2 | 2 | 2 | 2 | n/a | n/a | n/a | 2 | 2 | 2 | 2 | 2 | 2 | 1 | 0.95 |
| Loucaides 2009    | 1 | 2 | 1 | 1 | 1   | 0   | 0   | 1 | 2 | 2 | 1 | 0 | 1 | 1 | 0.50 |
| Magnusson 2011    | 2 | 2 | 1 | 2 | 1   | 0   | 0   | 2 | 2 | 2 | 2 | 2 | 2 | 2 | 0.79 |
| Mallam 2003       | 1 | 2 | 1 | 1 | n/a | n/a | n/a | 1 | 2 | 1 | 1 | 1 | 1 | 1 | 0.59 |
| Mayorga-Vega 2018 | 1 | 2 | 2 | 2 | n/a | n/a | n/a | 2 | 2 | 2 | 1 | 2 | 2 | 2 | 0.91 |
| Meyer 2013        | 2 | 2 | 2 | 2 | n/a | n/a | n/a | 2 | 2 | 2 | 2 | 2 | 2 | 2 | 1.00 |
| Møller 2014       | 2 | 1 | 2 | 2 | n/a | n/a | n/a | 2 | 2 | 2 | 2 | 2 | 2 | 2 | 0.95 |
| Mooses 2019       | 1 | 2 | 2 | 2 | n/a | n/a | n/a | 2 | 2 | 2 | 2 | 2 | 2 | 2 | 0.95 |
| Morgan 2007       | 2 | 2 | 2 | 1 | n/a | n/a | n/a | 1 | 2 | 2 | 1 | 1 | 2 | 2 | 0.82 |
| Nielsen 2012      | 2 | 2 | 2 | 2 | n/a | n/a | n/a | 2 | 2 | 2 | 2 | 2 | 2 | 2 | 1.00 |
| O'Dwyer 2013      | 1 | 2 | 2 | 2 | 2   | 0   | 0   | 2 | 2 | 2 | 2 | 2 | 2 | 1 | 0.79 |
| O'Neill 2016      | 2 | 2 | 1 | 2 | n/a | n/a | n/a | 2 | 2 | 2 | 1 | 1 | 1 | 1 | 0.77 |
| Owen 2003         | 2 | 2 | 1 | 1 | n/a | n/a | n/a | 2 | 2 | 2 | 2 | 1 | 2 | 2 | 0.86 |
| Palmer 2019       | 2 | 2 | 2 | 1 | 2   | 2   | 0   | 2 | 2 | 2 | 1 | 2 | 2 | 2 | 0.86 |
| Pate 2016         | 1 | 2 | 2 | 2 | 1   | 0   | 0   | 2 | 2 | 2 | 2 | 2 | 1 | 2 | 0.75 |
| Pelklova 2010     | 2 | 2 | 2 | 2 | n/a | n/a | n/a | 2 | 2 | 2 | 2 | 1 | 2 | 2 | 0.95 |
| Pesola 2018       | 2 | 2 | 2 | 2 | n/a | n/a | n/a | 2 | 1 | 2 | 1 | 1 | 2 | 2 | 0.86 |
| Ribeyre 2000      | 2 | 2 | 2 | 2 | n/a | n/a | n/a | 2 | 2 | 2 | 1 | 2 | 2 | 1 | 0.91 |

|                       |   |   |   |   |     |     |     |   |   |   |   |   |   |   |      |
|-----------------------|---|---|---|---|-----|-----|-----|---|---|---|---|---|---|---|------|
| Ridgers 2014          | 2 | 2 | 1 | 2 | n/a | n/a | n/a | 2 | 2 | 2 | 2 | 1 | 2 | 2 | 0.91 |
| Ridgers 2015          | 2 | 2 | 2 | 2 | n/a | n/a | n/a | 2 | 2 | 2 | 2 | 1 | 2 | 2 | 0.95 |
| Ridgers 2017          | 1 | 2 | 2 | 2 | n/a | n/a | n/a | 2 | 2 | 2 | 2 | 2 | 1 | 2 | 0.91 |
| Ridgers 2017b         | 1 | 2 | 2 | 1 | n/a | n/a | n/a | 2 | 2 | 2 | 2 | 2 | 2 | 2 | 0.91 |
| Rooney 2018           | 2 | 2 | 1 | 1 | n/a | n/a | n/a | 2 | 1 | 2 | 1 | 1 | 2 | 2 | 0.77 |
| Schneller 2017        | 1 | 2 | 2 | 1 | n/a | n/a | n/a | 2 | 2 | 2 | 1 | 1 | 2 | 2 | 0.82 |
| Schneller 2017b       | 2 | 2 | 2 | 2 | n/a | n/a | n/a | 2 | 2 | 2 | 1 | 1 | 2 | 2 | 0.91 |
| Sigmund 2014          | 2 | 2 | 2 | 2 | n/a | n/a | n/a | 2 | 2 | 2 | 1 | 1 | 2 | 2 | 0.91 |
| Smith 2012            | 2 | 2 | 2 | 2 | n/a | n/a | n/a | 2 | 2 | 2 | 2 | 2 | 2 | 2 | 1.00 |
| Stewart 2017          | 1 | 2 | 2 | 2 | n/a | n/a | n/a | 2 | 2 | 2 | 1 | 1 | 2 | 2 | 0.86 |
| Stylianou 2016        | 2 | 2 | 2 | 1 | n/a | n/a | n/a | 2 | 2 | 2 | 1 | 2 | 2 | 2 | 0.91 |
| Sutherland 2017       | 2 | 2 | 2 | 1 | 2   | 2   | 0   | 2 | 2 | 2 | 2 | 1 | 2 | 2 | 0.86 |
| Toftager 2014         | 2 | 2 | 2 | 2 | 2   | 0   | 0   | 1 | 2 | 2 | 2 | 2 | 2 | 2 | 0.82 |
| Trapp 2013            | 1 | 2 | 1 | 1 | n/a | n/a | n/a | 2 | 2 | 2 | 2 | 1 | 1 | 1 | 0.73 |
| Tudor-Locke 2006      | 2 | 2 | 2 | 2 | n/a | n/a | n/a | 1 | 2 | 2 | 1 | 1 | 1 | 1 | 0.77 |
| Vale 2011             | 2 | 2 | 2 | 2 | n/a | n/a | n/a | 2 | 2 | 2 | 1 | 1 | 1 | 2 | 0.86 |
| Van Cauwenberghe 2013 | 2 | 2 | 2 | 1 | n/a | n/a | n/a | 2 | 2 | 2 | 1 | 2 | 1 | 1 | 0.82 |
| Wilson 2017           | 2 | 2 | 1 | 1 | n/a | n/a | n/a | 2 | 2 | 2 | 1 | 1 | 2 | 2 | 0.82 |

Mean:  
0.86

SD: 0.10

**Frequencies**

|            |    |    |    |    |    |    |    |    |    |    |    |    |    |    |
|------------|----|----|----|----|----|----|----|----|----|----|----|----|----|----|
| <b>2</b>   | 55 | 76 | 63 | 52 | 7  | 4  | 0  | 69 | 70 | 75 | 36 | 44 | 61 | 62 |
| <b>1</b>   | 22 | 1  | 14 | 25 | 9  | 1  | 1  | 8  | 7  | 2  | 41 | 31 | 16 | 15 |
| <b>0</b>   | 0  | 0  | 0  | 0  | 0  | 11 | 15 | 0  | 0  | 0  | 0  | 2  | 0  | 0  |
| <b>n/a</b> | 0  | 0  | 0  | 0  | 61 | 61 | 61 | 0  | 0  | 0  | 0  | 0  | 0  | 0  |

**Abbreviation List**

n/a    not applicable
