# Supplementary material for: Compensation or Displacement of Physical Activity in Children and Adolescents: A Systematic Review of Empirical Studies
Source: MDPI journal article supplement (doi:10.3390/children9030351), 2022-03-03
Supplement: s1 [file s1]

Table S1 Data extraction of included studies

| <i>Author Study</i>                 | <i>Study design</i> | <i>Participa</i> Nts                  | <i>INT 1</i><br><i>INT 2</i><br><i>INT 3</i><br><i>CON</i> | <i>Purpose of the study</i>                                | <i>Setting</i> | <i>Intervention</i>                             | <i>Stimulus</i> | <i>Duration</i> | <i>Dose</i>            | <i>Measurement Instrument</i> | <i>Duration</i>                           | <i>measurement periods for compensatio</i><br><i>n</i>        | <i>indicators for compensatio</i><br><i>n</i>                                                     | <i>n</i>                                                  |                                                |
|-------------------------------------|---------------------|---------------------------------------|------------------------------------------------------------|------------------------------------------------------------|----------------|-------------------------------------------------|-----------------|-----------------|------------------------|-------------------------------|-------------------------------------------|---------------------------------------------------------------|---------------------------------------------------------------------------------------------------|-----------------------------------------------------------|------------------------------------------------|
|                                     |                     |                                       |                                                            |                                                            |                |                                                 |                 |                 |                        |                               |                                           |                                                               |                                                                                                   |                                                           |                                                |
| <b>Abuerto et al.; 2011; Mexico</b> | Cluster RCT         | N = 699; 10.2 years; m = 339; f = 360 | 240                                                        | effects of a school based environmental intervention on PA | intervent ion  | two additional PE classes/week                  |                 | 6 months        | 50min/day 2 times/week | Step counts                   | During school<br>Out of school<br>All day | p ≤ 0.05 ↑ during school overall PA ↔ supporting compensation | higher during school PA is compensated by less PA outside of school overall PA maintained stabled | INT1: during school ↑*(p≤ 0.05) out of school ↓ all day ↔ |                                                |
|                                     |                     |                                       |                                                            |                                                            |                | one additional recess (teacher promotion of PA) |                 |                 | 15min/day 5 times/week | Pedometer                     |                                           |                                                               |                                                                                                   |                                                           |                                                |
|                                     |                     |                                       |                                                            |                                                            |                |                                                 |                 |                 |                        | 5 days                        |                                           |                                                               |                                                                                                   |                                                           |                                                |
|                                     |                     |                                       |                                                            |                                                            |                |                                                 |                 |                 |                        |                               |                                           |                                                               |                                                                                                   |                                                           |                                                |
|                                     |                     |                                       |                                                            |                                                            |                | one additional PE class/week                    |                 | 242             | 50 min/day 1 time/week |                               |                                           |                                                               |                                                                                                   | INT 2: during school ↑ out of school ↔ all day ↑          |                                                |
|                                     |                     |                                       |                                                            |                                                            |                | one additional recess (teacher promotion of PA) |                 |                 | 15min/day 5 times/week |                               |                                           |                                                               |                                                                                                   |                                                           |                                                |
|                                     |                     |                                       |                                                            |                                                            |                |                                                 |                 |                 |                        |                               |                                           |                                                               |                                                                                                   |                                                           |                                                |
|                                     |                     |                                       | n.g.                                                       |                                                            |                |                                                 |                 |                 |                        |                               |                                           |                                                               |                                                                                                   |                                                           |                                                |
|                                     |                     |                                       |                                                            |                                                            |                |                                                 |                 |                 |                        |                               |                                           |                                                               |                                                                                                   |                                                           |                                                |
|                                     |                     |                                       | 217                                                        |                                                            |                |                                                 |                 |                 |                        | no change                     |                                           |                                                               |                                                                                                   |                                                           | CON: during school ↓ out of school ↑ all day ↓ |



[illegible]



|                            |     |                                   |    |                                                                       |              |                             |          |                           |               |                          |                                                        |                      |                                   |
|----------------------------|-----|-----------------------------------|----|-----------------------------------------------------------------------|--------------|-----------------------------|----------|---------------------------|---------------|--------------------------|--------------------------------------------------------|----------------------|-----------------------------------|
| n.g.                       |     |                                   |    |                                                                       |              |                             |          |                           |               |                          |                                                        |                      |                                   |
| 15no intervention          |     |                                   |    |                                                                       |              |                             |          |                           |               |                          |                                                        |                      |                                   |
| Alhassan et al.; 2012; USA | RCT | N = 71; 4.3 years; m = 35; f = 36 | 42 | effects of classroom teacher taught LMS-based PA program on PA levels | intervention | teacher taught LMS based PA | 6 months | 30 min/day 5 times a week | MVPA          | preschool time total day | p ≤ 0.05, ES: medium/small not supporting compensation | overall PA increased | INT 1:                            |
|                            |     |                                   |    |                                                                       |              |                             |          |                           | LPA           |                          |                                                        |                      | during Preschool SED ↓* (p≤ 0.02) |
|                            |     |                                   |    |                                                                       |              |                             |          |                           | Accelerometer |                          |                                                        |                      | during Preschool LPA ↑            |
|                            |     |                                   |    |                                                                       |              |                             |          |                           | 7 days        |                          |                                                        |                      | during preschool MVPA ↑           |
|                            |     |                                   |    |                                                                       |              |                             |          |                           |               |                          |                                                        |                      | total day SED ↓* (p≤ 0.01)        |
|                            |     |                                   |    |                                                                       |              |                             |          |                           |               |                          |                                                        |                      | total day LPA ↑                   |
|                            |     |                                   |    |                                                                       |              |                             |          |                           |               |                          |                                                        |                      | total day MVPA ↑                  |
| n.g.                       |     |                                   |    |                                                                       |              |                             |          |                           |               |                          |                                                        |                      |                                   |
| n.g.                       |     |                                   |    |                                                                       |              |                             |          |                           |               |                          |                                                        |                      |                                   |
|                            |     |                                   | 28 |                                                                       |              | no intervention             |          |                           |               |                          |                                                        |                      | CON:                              |
|                            |     |                                   |    |                                                                       |              |                             |          |                           |               |                          |                                                        |                      | during Preschool SED ↑            |
|                            |     |                                   |    |                                                                       |              |                             |          |                           |               |                          |                                                        |                      | during Preschool LPA ↓            |
|                            |     |                                   |    |                                                                       |              |                             |          |                           |               |                          |                                                        |                      | during preschool MVPA ↓           |
|                            |     |                                   |    |                                                                       |              |                             |          |                           |               |                          |                                                        |                      | total day SED ↑                   |
|                            |     |                                   |    |                                                                       |              |                             |          |                           |               |                          |                                                        |                      | total day LPA ↑                   |
|                            |     |                                   |    |                                                                       |              |                             |          |                           |               |                          |                                                        |                      | total day MVPA ↓                  |

|                                     |     |                                         |      |                                                                        |              |                                |         |                                |                                 |                                                |                                                           |                      |                                                                                                                                                                                                                                   |
|-------------------------------------|-----|-----------------------------------------|------|------------------------------------------------------------------------|--------------|--------------------------------|---------|--------------------------------|---------------------------------|------------------------------------------------|-----------------------------------------------------------|----------------------|-----------------------------------------------------------------------------------------------------------------------------------------------------------------------------------------------------------------------------------|
| Alhassan<br>et al.;<br>2013;<br>USA | RCT | N = 67; 4.1<br>years; m =<br>38; f = 29 | 38   | effects of<br>increasing<br>structured<br>outdoor<br>playtime on<br>PA | intervention | structured<br>outdoor playtime | 4 weeks | 30min/day<br>3 times a<br>week | MVPA<br>Accelerometer<br>5 days | total day<br>preschool time<br>after preschool | p ≤ 0.05 ↑ total<br>day<br>not supporting<br>compensation | overall PA increased | INT 1:<br>total day SED ↓*<br>(p≤ 0.01)<br>total day LPA ↑<br>total day MVPA<br>↑* (p ≤ 0.05)                                                                                                                                     |
|                                     |     |                                         |      |                                                                        |              |                                |         |                                |                                 |                                                |                                                           |                      | during school<br>SED ↓* (p≤ 0.01)<br>during school<br>LPA ↑<br>during school<br>MVPA ↑                                                                                                                                            |
|                                     |     |                                         |      |                                                                        |              |                                |         |                                |                                 |                                                |                                                           |                      | afterschool SED<br>↓<br>afterschool LPA<br>↑<br>afterschool<br>MVPA ↑                                                                                                                                                             |
|                                     |     |                                         | n.g. |                                                                        |              |                                |         |                                |                                 |                                                |                                                           |                      |                                                                                                                                                                                                                                   |
|                                     |     |                                         | n.g. |                                                                        |              |                                |         |                                |                                 |                                                |                                                           |                      |                                                                                                                                                                                                                                   |
|                                     |     |                                         | 29   |                                                                        |              | no intervention                |         |                                |                                 |                                                |                                                           |                      | CON:<br>total day SED ↑<br>total day LPA ↑<br>total day MVPA<br>↑<br><br>during school<br>SED ↑<br>during school<br>LPA ↑<br>during school<br>MVPA ↑<br><br>afterschool SED<br>↓<br>afterschool LPA<br>↑<br>afterschool<br>MVPA ↑ |

|                            |     |                           |      |                                                                   |              |                                                   |          |                          |                               |                                                    |                                                            |                                                                     |                                                         |                                                            |
|----------------------------|-----|---------------------------|------|-------------------------------------------------------------------|--------------|---------------------------------------------------|----------|--------------------------|-------------------------------|----------------------------------------------------|------------------------------------------------------------|---------------------------------------------------------------------|---------------------------------------------------------|------------------------------------------------------------|
| Alhassan et al.; 2016; USA | RCT | N = 291; 4.1 years; ;     | 141  | effects of short bouts of structured PA on preschoolers PA levels | intervention | short bouts structured PA                         | 6 months | 2x10min/day 5 days       | TPA Accelerometer 5 days      | intervention time total day                        | p ≤ 0.05 ↓ LPA, ↑ MVPA total day ↔ supporting compensation | overall PA maintained stable higher MVPA is compensated by less LPA | ES (MVPA): d= 0.24                                      | INT: MVPA ↑* (p < 0.001) LPA ↑* (p < 0.001) total day PA ↔ |
|                            |     |                           |      |                                                                   |              |                                                   |          |                          |                               |                                                    |                                                            |                                                                     | ES (LPA): d= 0.15                                       |                                                            |
|                            |     |                           |      |                                                                   |              |                                                   |          |                          |                               |                                                    |                                                            |                                                                     | ES (SED): d= 0.21 ==> small                             |                                                            |
|                            |     |                           | n.g. |                                                                   |              |                                                   |          |                          |                               |                                                    |                                                            |                                                                     |                                                         |                                                            |
|                            |     |                           | n.g. |                                                                   |              |                                                   |          |                          |                               |                                                    |                                                            |                                                                     |                                                         |                                                            |
|                            |     |                           | 150  |                                                                   |              | no intervention                                   |          |                          |                               |                                                    |                                                            |                                                                     | CON: MVPA ↓ LPA ↑ SED ↓ total day PA ↔                  |                                                            |
| Alhassan et al.; 2018; USA | RCT | N = 32 (all f); 8.3 years | 14   | efficacy of a mother-daughter intervention in girls PA level      | intervention | CH-M: afterschool dance intervention with mother  | 12 weeks | 60min/day 3 times a week | VPA MVPA Accelerometer 7 days | intervention time total afterschool time total day | total day ↔ supporting compensation                        | overall MVPA maintained stable                                      | INT 1: total day SED ↑ total day LPA ↓ total day MVPA ↔ |                                                            |
|                            |     |                           |      |                                                                   |              |                                                   |          |                          |                               |                                                    |                                                            |                                                                     | afterschool SED ↔                                       |                                                            |
|                            |     |                           |      |                                                                   |              |                                                   |          |                          |                               |                                                    |                                                            |                                                                     | afterschool LPA ↓ afterschool MVPA ↑                    |                                                            |
|                            |     |                           | 12   |                                                                   |              | CH: afterschool dance intervention without mother |          |                          |                               |                                                    | total day p > 0.05 supporting compensation                 | overall PA maintained stable PA did not significant change          | INT 2: total day SED ↑ total day LPA ↓ total day MVPA ↑ |                                                            |
|                            |     |                           |      |                                                                   |              |                                                   |          |                          |                               |                                                    |                                                            |                                                                     | afterschool SED ↑ afterschool LPA ↑                     |                                                            |

|                                      |                       |                             |                                                                                      |                    |                           |                           |                                      |                                                                                                                                    |                                                   |
|--------------------------------------|-----------------------|-----------------------------|--------------------------------------------------------------------------------------|--------------------|---------------------------|---------------------------|--------------------------------------|------------------------------------------------------------------------------------------------------------------------------------|---------------------------------------------------|
|                                      |                       |                             |                                                                                      |                    |                           |                           |                                      |                                                                                                                                    | afterschool<br>MVPA ↑                             |
|                                      |                       | n.g.                        |                                                                                      |                    |                           |                           |                                      |                                                                                                                                    |                                                   |
|                                      |                       | 6                           | no intervention                                                                      |                    |                           |                           |                                      | CON:<br>total day SED ↓<br>total day LPA ↑<br>total day MVPA ↑<br><br>afterschool SED ↓<br>afterschool LPA ↑<br>afterschool MVPA ↔ |                                                   |
| Aljuhani et al.; 2019; Saudi-Arabien | Cross Sectional Study | N = 111 (all m); 13.6 years | contribution of PE to daily PA by comparing daily levels on days with and without PE | Physical Education | MVPA Accelerometer 7 days | Day no PE PE day+ PE day- | p ≤ 0.05 not supporting compensation | higher PA on PE day than on non-PE day                                                                                             | MVPA PE+ >* non PE-day PE+ > PE- PE- = non PE-day |



**Baggett et al.; 2010; USA**  
Trial of Activity for Adolescent Girls (TAAG)

Cross  
Sectional Study

N = 6916  
(all f); 14.0 years;

evidence of compensation in middle school girlsrelations between inactivity, LPA, MVPA and total PA

daily PA pattern

inactivityLPA  
MVPA  
total PA  
Accelerometer  
6 days

n.i.

$p \leq 0.05$  not supporting compensation

Higher inactivity is associated with lower PA levelsHigher MVPA is associated with higher PA levels

Associations\*  
( $p < 0.01$ ) within a day and between two following days  
↑ inactivity: ↓ LPA  
↓ MVPA  
↓ total PA  
↑ MVPA: ↑ LPA  
↑ MVPA  
↓ inactivity

**Bin Tan et al.; 2019; Singapore**

Cross  
Sectional Study

N = 5600;  
7-18 years

effect of morning commuting on overall walking activity

active commuting to school

step counts

Pedometer

6 days

total day morning commuting

$p > 0.05$  before and after school  
total day steps  
Public transport = WALK = CAR  
supporting compensation

differences in steps before school and after school are compensated at other times

steps before school  
Public Transport > CAR  
WALK > CAR  
  
steps total day  
Public Transport = WALK = CAR  
  
steps after school  
Public transport > CAR  
WALK > CAR

|                                          |                       |                                        |                                                                                      |                    |                                |                                                                                                                                                                            |                                                                 |                                                                                        |                                                                                                                                 |                                          |                                                                   |
|------------------------------------------|-----------------------|----------------------------------------|--------------------------------------------------------------------------------------|--------------------|--------------------------------|----------------------------------------------------------------------------------------------------------------------------------------------------------------------------|-----------------------------------------------------------------|----------------------------------------------------------------------------------------|---------------------------------------------------------------------------------------------------------------------------------|------------------------------------------|-------------------------------------------------------------------|
| Bringolf-Isler et al.; 2009; Switzerland | Cross Sectional Study | N = 169; 6-14 years; m = 81; f = 88    | activity type and quantification of intensity and duration of children's everyday PA | daily PA pattern   | MPA<br>VPA<br>MVPA<br>Total PA | screen<br>reaction time<br>quit activity<br>public<br>transport<br>recess<br>moderate<br>intense play<br>walking<br>vigorous<br>intense play<br>PE class<br>sport training | p ≤ 0.05 ↑ high intensity sports, ↓ VPA supporting compensation | high intensity sports are compensated by being less vigorous active and more sedentary | Adolescents<br>↑* high intensity sports (p≤ 0.001)<br>↓* playing vigorous (p≤ 0.04)<br>↑* SED (p≤ 0.001)<br>↓* CPM (p≤ 0.007)   |                                          |                                                                   |
|                                          |                       |                                        |                                                                                      |                    | Accelerometer                  | 7 days                                                                                                                                                                     |                                                                 |                                                                                        |                                                                                                                                 |                                          |                                                                   |
| Brockmann et al.; 2010; UK               | Cross Sectional Study | N = 747; 10-11 years; m = 341; f = 406 | contribution of active play to children's PA                                         | Active play        | MVPA counts per minute         | Weekday after school<br>Weekend                                                                                                                                            | p ≤ 0.05 not supporting compensation                            | more active play leads to higher PA levels and CPM                                     | Weekday girls<br>MVPA/day ↑* (p≤ 0.01)<br>MVPA/afterschool ↑* (p≤ 0.04)<br>CPM/day ↑* (p≤ 0.01)<br>CPM/afterschool ↑* (p≤ 0.02) | Weekend girls<br>MVPA/day ↑<br>CPM/day ↑ | Whole week girls<br>MVPA/day ↑* (p≤ 0.02)<br>CPM/day ↑* (p≤ 0.01) |
|                                          |                       |                                        |                                                                                      |                    | Accelerometer                  | 5 days                                                                                                                                                                     |                                                                 |                                                                                        | Weekday boys<br>MVPA/day ↑<br>MVPA/afterschool ↑<br>CPM/day ↑* (p≤ 0.01)<br>CPM/afterschool ↑* (p≤ 0.01)                        |                                          |                                                                   |
| Brusseau et al.; 2011; USA               | Cross Sectional Study | N = 363; 9.7 years; m = 160; f = 203   | PA on PE days and non PE days                                                        | Physical Education | Step counts                    | PE day<br>non PE day<br>Weekend day<br>All day                                                                                                                             | p ≤ 0.05 not supporting compensation                            | overall PA on PE day is higher than on non PE day                                      | PA<br>PE day > non PE day (p<0.01)                                                                                              |                                          |                                                                   |
|                                          |                       |                                        |                                                                                      |                    | Pedometer                      | 7 days                                                                                                                                                                     |                                                                 |                                                                                        |                                                                                                                                 |                                          |                                                                   |

|                                |                                                |                       |                                        |                                                                    |                                   |                    |        |                                                  |                                                                                                                        |                                                                                      |                                                                                                                                                                                                                                                                                                                                                                                                                                                                                                                                                                                                                                                    |
|--------------------------------|------------------------------------------------|-----------------------|----------------------------------------|--------------------------------------------------------------------|-----------------------------------|--------------------|--------|--------------------------------------------------|------------------------------------------------------------------------------------------------------------------------|--------------------------------------------------------------------------------------|----------------------------------------------------------------------------------------------------------------------------------------------------------------------------------------------------------------------------------------------------------------------------------------------------------------------------------------------------------------------------------------------------------------------------------------------------------------------------------------------------------------------------------------------------------------------------------------------------------------------------------------------------|
| Carlson et al.; 2017; USA      | Teen Environment and Neighborhood (TEAN) study | Cross Sectional Study | N = 528; 14.12 years; m = 264; f = 264 | Association between PA in different locations                      | PA across locations               | MVPA Accelerometer | 7 days | home home neighborhood school neighborhood other | partial compensation $p \leq 0.05$ $\uparrow$ PA at school, $\downarrow$ PA at other locations supporting compensation | higher at school PA is compensated by less PA at other locations                     | Associations across location $\uparrow$ Home neighborhood --> at home $\uparrow^*$ ( $p \leq 0.001$ ) Generalization $\uparrow$ home neighborhood --> school environment $\leftrightarrow$ $\uparrow$ home neighborhood --> other locations $\uparrow$ at school --> home neighborhood $\downarrow$ Compensation $\uparrow$ at school --> school environment $\uparrow$ $\uparrow$ at school --> other locations $\downarrow^*$ ( $p \leq 0.006$ ) Compensation $\uparrow$ at home --> school environment $\downarrow$ $\uparrow$ other locations -> school neighborhood $\leftrightarrow$ $\uparrow$ other locations -> at home $\leftrightarrow$ |
|                                |                                                |                       |                                        |                                                                    |                                   |                    |        |                                                  |                                                                                                                        |                                                                                      |                                                                                                                                                                                                                                                                                                                                                                                                                                                                                                                                                                                                                                                    |
| Cheung et al.; 2019; Hong Kong |                                                | Cross Sectional Study | N = 242; 8.7 years; m = 131; f = 111   | associations between school based PA lessons and afterschool hours | PE and afterschool sports classes | MVPA Accelerometer | 4 days | afterschool hours school hours                   | $p \leq 0.05$ not supporting compensation                                                                              | overall PA is on PE day and Afterschool Sports Program higher than on non active day | N-Act day $<^*$ PE = ASP ( $p \leq 0.00$ )                                                                                                                                                                                                                                                                                                                                                                                                                                                                                                                                                                                                         |

|                          |                           |                                     |    |                                                                                       |                            |                           |         |               |                                                                         |                                                        |                                                                                                                     |                                                                  |                                                                        |
|--------------------------|---------------------------|-------------------------------------|----|---------------------------------------------------------------------------------------|----------------------------|---------------------------|---------|---------------|-------------------------------------------------------------------------|--------------------------------------------------------|---------------------------------------------------------------------------------------------------------------------|------------------------------------------------------------------|------------------------------------------------------------------------|
| Coombes et al.; 2016; UK | quasi experimental design | N = 80; 8-10 years                  | 51 | impact on active travel to school<br>intervention on increasing active travel         | intervention               | Beat the Street Challenge | 9 weeks | MVPA          | total day morning commute<br>afterschool commute<br>evening weekend day | p ≤ 0.05 supporting compensation                       | higher CPM during active commuting is compensated by less CPM during the evening                                    | CPM/MVPA morning commute WALK >* CAR (p≤ 0.001)                  |                                                                        |
|                          |                           |                                     |    |                                                                                       |                            |                           |         | Accelerometer |                                                                         |                                                        |                                                                                                                     | CPM/MVPA afternoon commute WALK >* CAR (p≤ 0.03)                 |                                                                        |
|                          |                           |                                     |    |                                                                                       |                            |                           |         | 7 days        |                                                                         |                                                        |                                                                                                                     | CPM/MVPA evening WALK <* CAR (p≤ 0.004)                          |                                                                        |
| n.g.                     |                           |                                     |    |                                                                                       |                            |                           |         |               |                                                                         |                                                        |                                                                                                                     |                                                                  |                                                                        |
| n.g.                     |                           |                                     |    |                                                                                       |                            |                           |         |               |                                                                         |                                                        |                                                                                                                     |                                                                  |                                                                        |
| 29                       |                           |                                     |    |                                                                                       |                            |                           |         |               |                                                                         |                                                        |                                                                                                                     |                                                                  |                                                                        |
|                          |                           |                                     |    |                                                                                       |                            | no intervention           |         |               |                                                                         |                                                        |                                                                                                                     |                                                                  |                                                                        |
| Cooper et al.; 2003; UK  | Cross Sectional Study     | N = 114; 10.4 years; m = 59; f = 55 |    | Comparison of PA patterns of children who walked with those who were driven to school | active commuting to school |                           |         | MVPA          |                                                                         | total MVPA Walk = CAR supporting compensation in girls | overall PA is similiar in girls<br>girls compensated for higher PA during 8-9am with lower PA levels at other times | afterschool MVPA WALK >* CAR (p≤ 0.017) only boys during evening |                                                                        |
|                          |                           |                                     |    |                                                                                       |                            |                           |         | Accelerometer | total day 8-9 am<br>Weekend                                             |                                                        |                                                                                                                     |                                                                  | MVPA WALK >* CAR (p≤ 0.017) only boys                                  |
|                          |                           |                                     |    |                                                                                       |                            |                           |         | 7 days        |                                                                         |                                                        |                                                                                                                     | p≤ 0.05 not supporting compensation in boys                      | overall PA is higher in boys who walk compared to boys who were driven |
|                          |                           |                                     |    |                                                                                       |                            |                           |         |               |                                                                         |                                                        |                                                                                                                     | total MVPA boys WALK > CAR -- > no compensation                  |                                                                        |
|                          |                           |                                     |    |                                                                                       |                            |                           |         |               |                                                                         |                                                        |                                                                                                                     | total MVPA girls WALK = CAR -- > compensation                    |                                                                        |



|                                                               |                       |                                      |                                                                                                                                                              |                                |                                                               |                                                                   |                                          |                                                                                                             |                                                                                                                                                                                                                                     |
|---------------------------------------------------------------|-----------------------|--------------------------------------|--------------------------------------------------------------------------------------------------------------------------------------------------------------|--------------------------------|---------------------------------------------------------------|-------------------------------------------------------------------|------------------------------------------|-------------------------------------------------------------------------------------------------------------|-------------------------------------------------------------------------------------------------------------------------------------------------------------------------------------------------------------------------------------|
| <b>Ford et al.; 2007; UK</b>                                  | Cross Sectional Study | N = 239; 8.1 years; m = 125; f = 114 | Comparison of daily activity levels in school children who walk with those who travel by car to and from school                                              | active commuting to school     | Counts per minute<br>Accelerometer<br>5 days                  | weekday in school out of school to and from school commuting time | CPM Walk = CAR supporting compensation   | higher to and from school CPM is compensated at other times<br>overall CPM are similar between WALK and CAR | Weekday WALK = CAR<br>In school WALK < CAR<br>out of school WALK < CAR<br>to and from school WALK >* CAR (p≤ 0.000)                                                                                                                 |
| <b>Fremeaux et al.; 2011; UK</b><br><br>Early Bird 46 – Study | longitudinal study    | N = 206; 9 years; m = 115; f = 91    | effects of different amounts of PA in school on total PA level                                                                                               | Physical Education             | total PA<br>MVPA<br>Accelerometer<br>7 days                   | in school out of school                                           | TPA S1 = S2 = S3 supporting compensation | overall PA is similar between the three schools<br>higher PE amounts are compensated                        | TPA<br>S1 = S2 = S3<br><br>TPA in school<br>S1 >* S2 = S3 (p<0.001)<br><br>TPA out of school<br>S1 < S2 = S3<br><br>MVPA<br>S1 = S2 = S3<br><br>MVPA in school<br>S1 >* S2 = S3 (p<0.001)<br><br>MVPA out of school<br>S1 < S2 = S3 |
| <b>Frömel et al.; 2012; Poland</b>                            | Cross Sectional Study | N = 497 (all f); 17.9 years          | differences in PA and inactivity structure in girls who do not participate in any organized PA and girls who regularly participate in PE or training lessons | organized sports participation | steps per day<br>LPA<br>MPA<br>VPA<br>Accelerometer<br>7 days | School Transport<br>Leisure<br>Home total                         | p ≤ 0.05 not supporting compensation     | higher sports club participation is associated with higher overall PA                                       | girls with highest Participation<br>↑* steps/day (p = 0.000)<br>↑* MPA (p = 0.000)<br>↑* VPA (p = 0.000)<br>↑* leisure PA (p = 0.000)                                                                                               |

|                                        |                       |                                       |                                                                       |                  |                   |                                                                  |                                      |                                                                                |                                                              |                                     |
|----------------------------------------|-----------------------|---------------------------------------|-----------------------------------------------------------------------|------------------|-------------------|------------------------------------------------------------------|--------------------------------------|--------------------------------------------------------------------------------|--------------------------------------------------------------|-------------------------------------|
| Gao et al.; 2015; China                | Cross Sectional Study | N = 68; 10.45 years; m = 28; f = 40   | Characterization of children's PA level during a segmented school day | daily PA pattern | Steps per day     | total day before school                                          | p ≤ 0.05 not supporting compensation | High active children are more active in every segment than low active children | Boys in recess (high active) HA >* (low active) LA (p≤ 0.05) | Girls in recess HA >* LA (p≤ 0.007) |
|                                        |                       |                                       |                                                                       |                  | Pedometer         | first-fifth session                                              |                                      |                                                                                | in lunch break HA > LA                                       | in lunch break HA < LA              |
|                                        |                       |                                       |                                                                       |                  | 4 days            | first-third recess                                               |                                      |                                                                                | in PE class HA > LA                                          | in PE class HA > LA                 |
|                                        |                       |                                       |                                                                       |                  |                   | lunch break after school                                         |                                      |                                                                                | before school HA >* LA (p≤ 0.05)                             | before school HA > LA               |
|                                        |                       |                                       |                                                                       |                  |                   |                                                                  |                                      | after school HA >* LA (p≤ 0.05)                                                | after school HA >* LA (p≤ 0.001)                             |                                     |
|                                        |                       |                                       |                                                                       |                  |                   |                                                                  |                                      |                                                                                |                                                              |                                     |
| Gidlow et al.; 2008; UK CHAMPS - Study | Cross Sectional Study | N = 503; 10.4 years; m = 250; f = 253 | Comparison of in and out PA                                           | daily PA pattern | Counts per minute | in school out of school school (before and after school weekday) | p ≤ 0.05 supporting compensation     | higher in school CPM are compensated by lower out of school CPM                | in school >* out of school (p≤ 0.001)                        |                                     |
|                                        |                       |                                       |                                                                       |                  | Accelerometer     | School related PA before, during or immediately after school     |                                      |                                                                                |                                                              |                                     |
|                                        |                       |                                       |                                                                       |                  |                   | After school (after 16h)                                         |                                      |                                                                                |                                                              |                                     |
|                                        |                       |                                       |                                                                       |                  |                   | 7 days                                                           |                                      |                                                                                |                                                              | Weekend periods                     |
|                                        |                       |                                       |                                                                       |                  |                   |                                                                  |                                      |                                                                                |                                                              |                                     |

|                                       |                    |                                     |                                                           |              |                                               |         |                           |                                                                        |                                                 |                                                   |                                                                                                                                                                                                                                                        |
|---------------------------------------|--------------------|-------------------------------------|-----------------------------------------------------------|--------------|-----------------------------------------------|---------|---------------------------|------------------------------------------------------------------------|-------------------------------------------------|---------------------------------------------------|--------------------------------------------------------------------------------------------------------------------------------------------------------------------------------------------------------------------------------------------------------|
| <b>Grasten et al.; 2015; Finland</b>  | longitudinal study | N = 76; 11.43 years; m = 36; f = 40 | Effects of Civil Skill Program on children's LPA patterns | intervention | psychological and physical school environment | 2 years | LPA Accelerometer 7 days  | Weekend before school After school PE classes Long breaks Short breaks | ES: medium, total LPA ↔ supporting compensation | overall LPA maintained stable LPA is rearranged   | boys: total LPA ↔ before school LPA ↓ after school LPA ↔ short break LPA ↔ class time LPA ↑ long break LPA ↓ weekend LPA ↓ girls: total LPA ↔ before school LPA ↓ after school LPA ↑ short break LPA ↔ class time LPA ↑ long break LPA ↔ weekend LPA ↓ |
| <b>Grasten et al.; 2015b; Finland</b> | longitudinal study | N = 76; 11.43 years; m = 36; f = 40 | Effects of Civil Skill Program on children's MPA patterns | intervention | psychological and physical school environment | 2 years | MVPA Accelerometer 7 days | Weekend before school After school PE classes Long breaks Short breaks | ES: small, total MVPA ↔ supporting compensation | overall MVPA maintained stable MVPA is rearranged | boys:total MVPA ↔before school MVPA ↓after school MVPA ↑short break MVPA ↓class time MVPA ↑long break MVPA ↓weekend MVPA ↑girls:total MVPA ↔before school MVPA ↓after school MVPA ↑short break MVPA ↓class time MVPA ↔long break MVPA ↓weekend MVPA ↓  |



|                                             |                                           |                                       |          |                                                                        |                    |                                              |         |                                    |                                                                                                                                                                                       |                                                                                                                                             |                                                                                          |                                                                                                                                                                                                                                                              |
|---------------------------------------------|-------------------------------------------|---------------------------------------|----------|------------------------------------------------------------------------|--------------------|----------------------------------------------|---------|------------------------------------|---------------------------------------------------------------------------------------------------------------------------------------------------------------------------------------|---------------------------------------------------------------------------------------------------------------------------------------------|------------------------------------------------------------------------------------------|--------------------------------------------------------------------------------------------------------------------------------------------------------------------------------------------------------------------------------------------------------------|
| <b>Groffik et al.; 2020; Poland/Czechia</b> | Cross Sectional Study                     | N = 921; 16.2 years; m = 324; f = 597 |          | Comparison of two differences education systems of children's PA level | Physical Education |                                              |         | Step counts<br>Pedometer<br>7 days | school time out of school total day                                                                                                                                                   | total daily steps CZ = PL, supporting compensation                                                                                          | overall steps are similar in CZ and PL higher PE amounts are compensated                 | total daily steps CZ = PL                                                                                                                                                                                                                                    |
| <b>Goodman et al.; 2011; UK</b>             | Cross Sectional Study                     | N = 345; 8-13 years; m = 161; f = 184 |          | compensatory effects of different behaviors                            | daily PA pattern   |                                              |         | MVPA Accelerometer<br>4 days       | Weekend/week day Own/friend's other home School lesson PE 2School Breaks Non home events Clubs Passive travel School/non school active travel Structured sport Out of home play other | ↑ inactivity at home, ↑ MVPA during rest of the day small partial supporting compensation p ≤ 0.05 ↑ PE, ↑ MVPA not supporting compensation | higher inactivity at home is compensated by more MVPA during the rest of the day         | ↑time at home --> ↓ MVPA (p≤ 0.05)<br>↑ time in school -> ↓ MVPA (p≤ 0.05)<br><br>↑ PE/games, school breaks, active travel, structured sports --> ↑ MVPA (p≤ 0.05)<br><br>↑at home on weekends --> ↑ MVPA during rest of the day (only partial compensation) |
| <b>Haapala et al.; 2017; Finland</b>        | quasi experimental design<br>Move Program | N = 185; 9.3 years                    | 4 school | effects of Move program on children's PA levels                        | intervention       | Move program to make school days more active | 2 years | MVPA SED Accelerometer<br>7 days   | school day outside school hours total day                                                                                                                                             | p ≤ 0.05 ↑ school MVPA, ↓leisure, ES: small supporting compensation                                                                         | overall PA maintained stable higher school day PA is compensated by less leisure time PA | School day MVPA ↑* (p = 0.01)<br>School day SED ↓* (P = 0.008)<br>Leisure time MVPA ↓ (p < 0.001)<br>whole day MVPA or ST ↔                                                                                                                                  |
| n.g.                                        |                                           |                                       |          |                                                                        |                    |                                              |         |                                    |                                                                                                                                                                                       |                                                                                                                                             |                                                                                          |                                                                                                                                                                                                                                                              |

|                             |                       |                                   |                                                              |                                   |                                                |           |                                                       |                                                   |                                                                                                               |                                                                                                      |                                                                                                                                                                                                                          |
|-----------------------------|-----------------------|-----------------------------------|--------------------------------------------------------------|-----------------------------------|------------------------------------------------|-----------|-------------------------------------------------------|---------------------------------------------------|---------------------------------------------------------------------------------------------------------------|------------------------------------------------------------------------------------------------------|--------------------------------------------------------------------------------------------------------------------------------------------------------------------------------------------------------------------------|
| n.g.                        |                       |                                   |                                                              |                                   |                                                |           |                                                       |                                                   |                                                                                                               |                                                                                                      |                                                                                                                                                                                                                          |
| 2 schools                   |                       |                                   |                                                              |                                   |                                                |           |                                                       |                                                   |                                                                                                               |                                                                                                      |                                                                                                                                                                                                                          |
| Hardman et al.; 2009; UK    | Cross sectional Study | N = 95; 9.9 years; m = 38; f = 57 | Comparison of pedometer steps during school and leisure time | PA during school and Leisure time |                                                |           | step counts<br>Pedometer<br>6 days                    | school time<br>leisure time<br>weekday<br>weekend | p ≤ 0.05 not supporting compensation                                                                          |                                                                                                      | high and mid active<br>leisure time steps >* school time steps (p < 0.001)<br><br>low active<br>leisure time steps = school time steps<br><br>school activity<br>HA >* LA (p < 0.001)<br>HA >* MD (p < 0.001)<br>MD > LA |
| Harrington et al.; 2008; UK | RCT                   | N = 1211; 12.8 years              | Effects of Girls Active program                              | intervention                      | Girls Active Program (framework for school PE) | 13 months | LPA<br>MVPA<br>SED<br><br>Accelerometer<br><br>7 days | school hours out of school hours                  | p ≤ 0.05 not supporting compensation at 7 months<br><br>LPA, MVPA, SED ↔ supporting compensation at 14 months | 7 months: overall PA increased<br><br>14 months: overall PA maintained stable (compared to baseline) | 7 months: total PA ↑* (p= 0.03)<br>SED during after school ↓* (p= 0.026)<br>total LPA ↑* (p= 0.018)<br>LPA on school day ↑* (p= 0.038)<br><br>14 months: no differences at any time of the day                           |

|                                    |                                                                       |                       |                                        |                                                                                                                 |                  |                                                |                                   |                                                                                                                         |                                                                                                                                            |                                                                                                                                                                                                                                                                                                                                 |
|------------------------------------|-----------------------------------------------------------------------|-----------------------|----------------------------------------|-----------------------------------------------------------------------------------------------------------------|------------------|------------------------------------------------|-----------------------------------|-------------------------------------------------------------------------------------------------------------------------|--------------------------------------------------------------------------------------------------------------------------------------------|---------------------------------------------------------------------------------------------------------------------------------------------------------------------------------------------------------------------------------------------------------------------------------------------------------------------------------|
| <b>Herman et al.; 2014; Canada</b> | Quebec Adipose and Lifestyle Investigation in Youth (QUALITY) - Study | Cross Sectional Study | N = 532; 9.6 years; m = 286; f = 246   | associations between PA intensities                                                                             | daily PA pattern | LPA<br>VPA<br>MVPA<br>SED<br><br>Accelerometer | n.i.                              | p ≤ 0.05 not supporting compensation                                                                                    | higher PA is associated with higher overall PA and less SED                                                                                | higher MVPA --> ↓* SED (p < 0.001)<br>higher MVPA --> ↑* TPA (p < 0.001)<br><br>higher VPA --> ↓* SED (p < 0.001)<br>higher VPA --> ↑* TPA (p < 0.001)<br><br>higher LPA --> ↓* SED (p < 0.001)                                                                                                                                 |
| <b>Jago et al.; 2014; UK</b>       | Action 3:30 - Study                                                   | Cross Sectional Study | N = 469; 10.05 years; m = 201; f = 268 | differences in PA in those who travelled to school actively compared (A) with those who travelled passively (P) | intervention     | Counts per minute MVPA<br><br>Accelerometer    | total day<br>afterschool<br>hours | p ≤ 0.05 not supporting compensation in girls<br><br>weekday and afterschool MVPA A = P supporting compensation in boys | active travel girls had higher PA levels than passiv travel girls<br><br>active travel boys had similar PA levels than passive travel boys | Travel to school boys<br>Weekday MVPA A = P<br>afterschool MVPA A = P<br><br>Travel from school boys<br>Weekday MVPA A = P<br>afterschool MVPA A = P<br><br>Travel to school girls<br>Weekday MVPA A >* P (p = 0.004)<br>afterschool MVPA A > P<br><br>Travel from school girls<br>Weekday MVPA A > P<br>afterschool MVPA A > P |



$$AT = AT + MT = MT$$

|                                     |                           |                                    |    |                                                  |              |                                             |          |               |            |                                                       |                          |                                                                  |
|-------------------------------------|---------------------------|------------------------------------|----|--------------------------------------------------|--------------|---------------------------------------------|----------|---------------|------------|-------------------------------------------------------|--------------------------|------------------------------------------------------------------|
| <b>Kidokoro et al.; 2019; Japan</b> | quasi experimental design | N = 38; 11.3 years; m = 22; f = 16 | 18 | effects of standing desks on children's PA level | intervention | individual height adjustable standing desks | 6 months | LPA MVPA SED  | every hour | $p \leq 0.05$ , ES: large not supporting compensation | INT increased overall PA | INT group SB ↓* ( $p < 0.082$ )<br>LPA ↔ MVPA ↑* ( $p < 0.005$ ) |
|                                     |                           |                                    |    |                                                  |              |                                             |          | Accelerometer |            |                                                       |                          | 5 days                                                           |

|                                                                                               |                       |                                       |                                                             |                                |                                 |                             |                                           |                                                                               |                                                                                                                    |
|-----------------------------------------------------------------------------------------------|-----------------------|---------------------------------------|-------------------------------------------------------------|--------------------------------|---------------------------------|-----------------------------|-------------------------------------------|-------------------------------------------------------------------------------|--------------------------------------------------------------------------------------------------------------------|
| <b>Kippe et al.; 2018; Norway</b>                                                             | Cross Sectional Study | N = 244; 4-6 years; m = 125; f = 119  | children's Pa level at kindergarten related to leisure time | daily PA pattern               | MVPA<br>Accelerometer<br>7 days | preschool time leisure time | $p \leq 0.05$ not supporting compensation | higher PA in kindergarten is associated with higher PA levels in leisure time | PA in kindergarten >*<br>PA in leisure time ( $p < 0.05$ )<br><br>↑ PA in Kindergarten --><br>↑ PA in leisure time |
| <b>Kobel et al.; 2017; Germany</b><br><br>Join the Healthy Boat – Study                       | Cross Sectional Study | N = 294; 7.1 years; m = 141; f = 153  | effects of PE on children's PA levels                       | Physical Education             | MVPA<br>Accelerometer<br>6 days | PE day<br>non PE day        | $p \leq 0.05$ not supporting compensation | overall PA is higher on PE days than on non-PE days                           | MVPA<br>PE days >* no PE day ( $p \leq 0.01$ )<br><br>PE day - PA during PE > non PE day                           |
| <b>Koorts et al.; 2019; Australia</b><br><br>NEighbourhood Activity in Youth (NEArbY) – Study | Cross Sectional Study | N = 358; 15.3 years; m = 146; f = 212 | Contribution of sports participation to overall PA          | organized sports participation | MVPA<br>Accelerometer<br>8 days | n.i.                        | $p \leq 0.05$ not supporting compensation | higher frequency of sports participation is associated with higher PA levels  | ↑ number and frequency of sports participation --><br>↑* MVPA ( $p=0.004$ )                                        |

|                                              |                       |                                         |      |                                               |                  |                                                               |          |                                                |                                                      |                                                 |                                                           |                                                                                      |
|----------------------------------------------|-----------------------|-----------------------------------------|------|-----------------------------------------------|------------------|---------------------------------------------------------------|----------|------------------------------------------------|------------------------------------------------------|-------------------------------------------------|-----------------------------------------------------------|--------------------------------------------------------------------------------------|
| Long et al.; 2013; USA<br><br>NHANES - Study | Cross Sectional Study | N = 2548; 9.5 years; m = 1266; f = 1282 |      | effects of higher school day PA on overall PA | daily PA pattern |                                                               |          | VPA<br>MVPA<br><br>Accelerometer<br><br>7 days | before school<br>school time<br>after school evening | p ≤ 0.05 not supporting compensation            | higher school day PA is associated with higher overall PA | 1 additional min of school day<br>MVPA --><br>1.14min of total day MVPA* (p < 0.001) |
|                                              |                       |                                         |      |                                               |                  |                                                               |          |                                                |                                                      |                                                 |                                                           | 1 additional min of school day<br>VPA --> 1.15min of total day VPA* (p < 0.001)      |
|                                              |                       |                                         |      |                                               |                  |                                                               |          |                                                |                                                      |                                                 |                                                           | higher school day MVPA --> ↑ total daily MVPA                                        |
| Loucaides et al.; 2009; Cyprus               | RCT                   | N = 247; 11.1 years                     | 89   | effects of interventions on children's PA     | intervention     | play space for team games, playground markings and long ropes | 2 months | Step counts<br><br>Pedometer<br><br>4 days     | 20min break after school                             | p ≤ 0.05, ES: small not supporting compensation | INT increased mean overall steps                          | INT 1:<br>4 weeks after intervention mean steps ↑* (p < 0.001; p < 0.01)             |
|                                              |                       |                                         |      |                                               |                  |                                                               |          |                                                |                                                      |                                                 |                                                           | afterschool activity ↑                                                               |
|                                              |                       |                                         |      |                                               |                  |                                                               |          |                                                |                                                      |                                                 |                                                           | INT 2:<br>4 weeks after intervention mean steps ↑* (p < 0.001; p < 0.01)             |
|                                              |                       |                                         | 89   |                                               |                  | play spaces for team games                                    | 2 months |                                                |                                                      |                                                 | INT increased mean overall steps                          | afterschool activity ↑                                                               |
|                                              |                       |                                         | n.g. |                                               |                  |                                                               |          |                                                |                                                      |                                                 |                                                           |                                                                                      |
|                                              |                       |                                         | 69   |                                               |                  | no intervention                                               |          |                                                |                                                      |                                                 |                                                           |                                                                                      |

|                                 |                       |                                     |                                       |                                       |                    |                                                                                           |                                  |                                                                                   |                                                                                      |                                                                        |                                                     |                                                                |
|---------------------------------|-----------------------|-------------------------------------|---------------------------------------|---------------------------------------|--------------------|-------------------------------------------------------------------------------------------|----------------------------------|-----------------------------------------------------------------------------------|--------------------------------------------------------------------------------------|------------------------------------------------------------------------|-----------------------------------------------------|----------------------------------------------------------------|
| Magnusson et al.; 2011; Iceland | Cluster RCT           | N = 196; 7.3 years; m = 87; f = 109 | 100                                   | changes in volume and intensity of PA | intervention       | school based PA intervention (engage children to be more physically active during school) | 2 years                          | counts per minute MVPA                                                            | in school out of school                                                              | p ≤ 0.05 not supporting compensation during first year of intervention | first year: higher PA levels in INT compared to CON | after 1 year during school hours PA<br>INT >* CON (p < 0.0001) |
|                                 |                       |                                     |                                       |                                       |                    |                                                                                           |                                  | Accelerometer                                                                     |                                                                                      | INT = CON supporting compensation at the end of the intervention       |                                                     | end of intervention during school hours PA<br>INT = CON        |
|                                 |                       |                                     |                                       |                                       |                    |                                                                                           |                                  | 7 days                                                                            |                                                                                      |                                                                        |                                                     | after 1 year after school hours PA<br>INT > CON                |
| n.g.                            |                       |                                     |                                       |                                       |                    |                                                                                           |                                  |                                                                                   |                                                                                      |                                                                        |                                                     |                                                                |
| n.g.                            |                       |                                     |                                       |                                       |                    |                                                                                           |                                  |                                                                                   |                                                                                      |                                                                        |                                                     |                                                                |
|                                 |                       |                                     | 96                                    | no intervention                       |                    |                                                                                           |                                  |                                                                                   |                                                                                      |                                                                        |                                                     |                                                                |
| Mallam et al.; 2003; UK         | Cross Sectional Study | N = 159; 9.0 years; m = 85; f = 74  | impact of timetabled PE on overall PA |                                       | Physical Education |                                                                                           |                                  |                                                                                   |                                                                                      |                                                                        |                                                     |                                                                |
|                                 |                       |                                     |                                       |                                       |                    | units/week                                                                                | total day in school after school | p ≤ 0.05 ↓ out of school, ↑ in school<br>TPA S1 = S2 = S3 supporting compensation | overall PA is similar between the three schools<br>higher PE amounts are compensated | TPA<br>S1 = S2 = S3                                                    |                                                     |                                                                |
|                                 |                       |                                     |                                       |                                       |                    | Accelerometer                                                                             |                                  | TPA in school<br>S1 >* S2 = S3 (p > 0.001)                                        |                                                                                      |                                                                        |                                                     |                                                                |
|                                 |                       |                                     |                                       |                                       |                    | 7 days                                                                                    |                                  |                                                                                   |                                                                                      |                                                                        | TPA out of school<br>S1 <* S2 = S3 (p > 0.001)      |                                                                |





|                                                                         |                                  |                                             |                                                                          |                                       |                                                                    |               |                              |                                              |                                            |                                                                                                                                                            |                                                                                                                                                                    |                                                                                                                                                                                                                                                                                                                                                                                                                                                                                                                                         |
|-------------------------------------------------------------------------|----------------------------------|---------------------------------------------|--------------------------------------------------------------------------|---------------------------------------|--------------------------------------------------------------------|---------------|------------------------------|----------------------------------------------|--------------------------------------------|------------------------------------------------------------------------------------------------------------------------------------------------------------|--------------------------------------------------------------------------------------------------------------------------------------------------------------------|-----------------------------------------------------------------------------------------------------------------------------------------------------------------------------------------------------------------------------------------------------------------------------------------------------------------------------------------------------------------------------------------------------------------------------------------------------------------------------------------------------------------------------------------|
| <p><b>Møller et al.; 2014; Denmark</b></p> <p>The CHAMPS - Study DK</p> | <p>quasi experimental design</p> | <p>N = 2130; 9,9 years</p>                  | <p>Effects of sport school on children PA level in different domains</p> | <p>intervention</p>                   | <p>increased mandatory PE lessons from 2 to 6 lessons per week</p> | <p>1 year</p> | <p>at least 4,5h PE/week</p> | <p>MVPA SED<br/>Accelerometer<br/>7 days</p> | <p>school time leisure time</p>            | <p>p ≤ 0.05 ↑ school time PA in sport schools, ↓ leisure time PA in sports schools<br/>total PA sport schools = normal schools supporting compensation</p> | <p>higher school time PA in sports schools is compensated by less leisure time PA in sports school<br/>overall PA is similar between sports and normal schools</p> | <p>school time PA boys in sport schools &gt;* boys in normal schools (p &lt; 0.001)<br/>girls in sport schools &gt; girls in normal schools</p> <p>leisure time MVPA boys in sport schools &lt;* boys in normal schools (p &lt; 0.001)<br/>girls in sport schools &lt;* girls in normal schools (p &lt; 0.004)</p> <p>leisure time SED boys in sport schools &gt; boys in normal schools<br/>girls in sport schools &gt; girls in normal schools</p> <p>total PA, PE, recess children in sport schools = children in normal schools</p> |
| <p><b>Mosses et al.; 2019; Estonia</b></p>                              | <p>Cross Sectional Study</p>     | <p>N = 492; 9.3 years; m = 226; f = 266</p> | <p>contributing role of organized sport participation to daily MVPA</p>  | <p>organized sports participation</p> |                                                                    |               |                              | <p>MVPA<br/>Accelerometer<br/>7 days</p>     | <p>during training outside of training</p> | <p>p ≤ 0.05 not supporting compensation</p>                                                                                                                | <p>overall PA is higher on training day than non training day<br/>more training PA is associated with increased overall PA</p>                                     | <p>1 additional min of training<br/>MVPA --&gt; 1.3 min increase in daily MVPA</p> <p>MVPA training day &gt;* non training day -(p&lt; 0.05)</p>                                                                                                                                                                                                                                                                                                                                                                                        |

|                          |                       |                                       |                                                                                      |                    |             |                   |                                      |                                                       |                                                                     |
|--------------------------|-----------------------|---------------------------------------|--------------------------------------------------------------------------------------|--------------------|-------------|-------------------|--------------------------------------|-------------------------------------------------------|---------------------------------------------------------------------|
| Morgan et al.; 2007; USA | Cross Sectional Study | N = 485; 6-11 years; m = 205; f = 280 | contribution of PE to daily PA by comparing daily levels on days with and without PE | Physical Education | step counts |                   |                                      |                                                       | steps/day high active group<br>PE day >* non PE day (p < 0.001)     |
|                          |                       |                                       |                                                                                      |                    | Pedometer   | PE day non-PE day | p ≤ 0.05 not supporting compensation | overall PA is higher on PE day compared to non-PE day | steps/day moderate active group<br>PE day >* non PE day (p < 0.001) |
|                          |                       |                                       |                                                                                      |                    | 2 weeks     |                   |                                      |                                                       | steps/day low active group<br>PE day >* non PE day (p < 0.001)      |













|                                |                    |                                   |                                                                                                                                                                     |                                             |   |                              |                                          |                                           |                                                             |                                                                                                                                                                               |
|--------------------------------|--------------------|-----------------------------------|---------------------------------------------------------------------------------------------------------------------------------------------------------------------|---------------------------------------------|---|------------------------------|------------------------------------------|-------------------------------------------|-------------------------------------------------------------|-------------------------------------------------------------------------------------------------------------------------------------------------------------------------------|
| Pelklova et al.; 2010; Czechia | longitudinal study | N = 13; 15.2 years; m = 2; f = 11 | pedometer-determined PA over one school year for two groups: children who engage regular in afterschool PA and those who were not engaged in regular afterschool PA | organized after school sports participation | i | step counts Pedometer 1 year | weekday with PEweekday without PEweekend | $p \leq 0.05$ not supporting compensation | higher overall PA in children who partake in afterschool PA | steps/dayweekdays with PE ASPA >* non ASPA ( $p < 0.0001$ )steps/day weekdays without PE ASPA >* non ASPA ( $p < 0.0001$ )steps/day weekend ASPA >* non ASPA ( $p < 0.0001$ ) |
|--------------------------------|--------------------|-----------------------------------|---------------------------------------------------------------------------------------------------------------------------------------------------------------------|---------------------------------------------|---|------------------------------|------------------------------------------|-------------------------------------------|-------------------------------------------------------------|-------------------------------------------------------------------------------------------------------------------------------------------------------------------------------|



|                                        |                       |                                       |                                                                               |                  |                                   |                                                                   |                                                                                                  |                                                                                                            |                                                                                                                                                                                                     |
|----------------------------------------|-----------------------|---------------------------------------|-------------------------------------------------------------------------------|------------------|-----------------------------------|-------------------------------------------------------------------|--------------------------------------------------------------------------------------------------|------------------------------------------------------------------------------------------------------------|-----------------------------------------------------------------------------------------------------------------------------------------------------------------------------------------------------|
| <b>Ribeyre et al.; 2000; France</b>    | Cross Sectional Study | N = 50; 17.0 years; m = 27; f = 23    | day to day variations in daily EE of athletic and non athletic adolescents    | Daily EE Pattern | EE HR monitor 7 days              | total day sleep school work meals Exercise miscellaneous activity | p ≤ 0.05 ↑ EE during exercise, ↓ EE during school and miscellaneous work supporting compensation | athletes compensated for higher EE during exercise with lower EE during school work and miscellaneous work | EE during school work athletes <* non athletes (p < 0.01)<br><br>EE during exercise athletes >* non athletes (p < 0.001)<br><br>EE during miscellaneous work athletes <* non athletes (p < 0.001)   |
| <b>Ridgers et al.; 2014; Australia</b> | Cross Sectional Study | N = 248; 10.0 years; m = 121; f = 127 | Associations between PA levels on one day with PA levels on the following day | daily PA pattern | LPA MVPA SED Accelerometer 7 days | given day following day                                           | p ≤ 0.05 ↑ PA on day 1, ↓ PA on day 2 supporting compensation                                    | higher PA on one day is compensated by less PA on the other day                                            | MVPA(D1) ---> MVPA(D2) ↓* (p < 0.001)<br>LPA (D1) --> LPA(D2) ↓* (p < 0.001)<br>SED (D1) --> SED(D2) ↓* (p < 0.014)<br>LPA (D1) --> MVPA(D2) ↓* (p < 0.001)<br>MVPA (D1) --> LPA(D2) ↓* (p < 0.001) |

Ridgers et al.; 2015; Australia

Patterns of Habitual Activity across Seasons (PHASE) - Study

Cross Sectional Study

N = 235; 10.1 years; m = 125; f = 110

correlations between primary school children's sitting, standing and stepping time within and between days

PA within and between days

sitting time  
standing time  
stepping time  
  
Accelerometer  
  
8 days

before school  
at school  
after school

$p \leq 0.05$  ↑ PA on day 1, ↓ PA on day 2 supporting compensation

higher PA on one day (D1) is compensated by less PA on the other day (D2)

| Weekday                   | Weekend day               |
|---------------------------|---------------------------|
| Step(D1) -->              | Step(D1) -->              |
| Step(D2) ↓* (p < 0.001)   | Step(D2) ↓* (p < 0.001)   |
| Step(D1) -->              | Step(D1) -->              |
| Stand(D2) ↓* (p < 0.001)  | Stand(D2) ↓* (p < 0.001)  |
| Step(D1) -->              | Step(D1) -->              |
| Sit(D2) ↑                 | Sit(D2) ↑* (p > 0.001)    |
| Sit(D1) -->               | Sit(D1) -->               |
| Sit(D2) ↓* (p < 0.001)    | Sit(D2) ↓* (p < 0.001)    |
| Sit(D1) -->               | Sit(D1) -->               |
| Stand(D2) ↑* (p = 0.004)  | Stand(D2) ↑* (p < 0.001)  |
| Sit(D1) -->               | Sit(D1) -->               |
| Step(D2) ↑* (p < 0.001)   | Step(D2) ↑* (p < 0.001)   |
| Stand(D1) -->             | Stand(D1) -->             |
| Stand (D2) ↓* (p < 0.001) | Stand (D2) ↓* (p < 0.001) |
| Stand(D1) -->             | Stand(D1) -->             |
| Step (D2) ↑               | Step (D2) ↓* (p < 0.001)  |
| Stand(D1) -->             | Stand(D1) -->             |
| Sit(D2) ↑* (p < 0.001)    | Sit(D2) ↑* (p < 0.001)    |

Ridgers et al.; 2017; Australia

Fitness, Activity and Skills Testing (FAST) - Study

Cross Sectional Study

ACC: N = 127; 10.45 years; m = 64, f = 63  
  
SW: N = 98; 10.45 years; m = 48, f = 50

Association between Pa levels and EE on one day with these behaviors on the following day

daily PA pattern

LPA  
MVPA  
EE  
  
Accelerometer  
SenseWear  
Armband

8 days

given day following day

$p \leq 0.05$  ↑ PA on day 1, ↓ PA on day 2 supporting compensation

higher PA on one day (D1) is compensated by less PA on the other day (D2)

MVPA(D1) --->  
MVPA(D2) ↓\* (p < 0.001)  
LPA (D1) -->  
LPA(D2) ↓\* (p < 0.001)  
LPA (D1) -->  
MVPA(D2)↓\* (p < 0.001)  
MVPA (D1) -->  
LPA(D2)↓\* (p < 0.001)  
EE(D1) -->  
EE(D2) ↓\* (p < 0.001)

|                                         |                                     |                                                                                         |                                                                                                                   |                    |                                                                                                                                                                  |        |                                                                   |                                         |                                             |                                                                                                             |                                                                                                                                                                                                         |                                                                                  |                                                                                                                                                                                                                                                                           |
|-----------------------------------------|-------------------------------------|-----------------------------------------------------------------------------------------|-------------------------------------------------------------------------------------------------------------------|--------------------|------------------------------------------------------------------------------------------------------------------------------------------------------------------|--------|-------------------------------------------------------------------|-----------------------------------------|---------------------------------------------|-------------------------------------------------------------------------------------------------------------|---------------------------------------------------------------------------------------------------------------------------------------------------------------------------------------------------------|----------------------------------------------------------------------------------|---------------------------------------------------------------------------------------------------------------------------------------------------------------------------------------------------------------------------------------------------------------------------|
| <b>Ridgers et al.; 2017b; Australia</b> | randomized but not controlled Study | ACC: N = 156; 11.3 years; m = 72, f = 84<br><br>SW: N = 145; 11.3 years; m = 71, f = 74 | Exploring the ActivityStat hypothesis by investigating children's short term response to imposed or restricted PA | intervention       | 1. additional MVPA (sport session delivered during morning class - 120min session)<br>2. additional LPA (standing lesson - 120min)<br>3. restricted LPA and MVPA | 1 week | LPA MVPA SED<br><br>Accelerometer SenseWear Armband<br><br>5 days | experimental day after experimental day | p ≤ 0.05 not supporting compensation        | higher PA on one day is associated with no changes in PA on the next day (compared to usual PA on that day) | Increased MVPA (Sport Club Session)<br>↑*SED on day after Exp. (p< 0.05)<br>↓*MVPA on day after Exp.(p< 0.05)<br>↓* CPM on day after Exp.(p< 0.05)<br><br>But: no differences with usual PA on that day | Increased LPA (Standing lesson Session) no differences with usual PA on that day | Restricted MVPA and LPA (Indoor play)<br>↓*SED on day after Exp. (p< 0.05)<br>↑*MVPA on day after Exp. (p< 0.05)<br>↑*CPM on day after Exp. (p< 0.05)<br>↑*LPA on day after Exp. (p< 0.05)<br><br>But: no differences with usual PA on that day<br>↑*EE on day after Exp. |
| <b>Rooney et al.; 2018; UK</b>          | Cross Sectional Study               | N = 61; 9.3 years; m = 24; f = 37                                                       | influence of PE and recess on overall PA                                                                          | Physical Education |                                                                                                                                                                  |        | MVPA<br><br>Accelerometer<br><br>4 days                           | PE day non-PE day PE Recess Lunch       | PE day = non PE day supporting compensation | overall PA is similar on PE day and non PE day                                                              | PA on PE day = PA on non PE day                                                                                                                                                                         |                                                                                  |                                                                                                                                                                                                                                                                           |



|                                  |                           |                     |                                                                                    |              |      |        |               |                               |                                              |                                      |                                                                           |                                                                                                                                                                                                 |
|----------------------------------|---------------------------|---------------------|------------------------------------------------------------------------------------|--------------|------|--------|---------------|-------------------------------|----------------------------------------------|--------------------------------------|---------------------------------------------------------------------------|-------------------------------------------------------------------------------------------------------------------------------------------------------------------------------------------------|
| Schneller et al.; 2017b; Denmark | quasi experimental design | N = 663; 10.8 years | Effect of Education outside the Classroom (EOtC) on PA levels in different domains | intervention | EOtC | 1 year | 300min weekly | LPA MVPA Accelerometer 7 days | school day with EOtC school day without EOtC | p ≤ 0.05 not supporting compensation | higher overall PA levels on days with EOtC compared to a day without EOtC | boys:<br>LPA<br>school day with EOtC >* school day without EOtC and PE (p< 0.001)<br>school day with EOtC >* school day with PE (p < 0.001)<br>school day with EOtC >* weekend day (p < 0.001)  |
|                                  |                           |                     |                                                                                    |              |      |        |               |                               |                                              |                                      |                                                                           | girls:<br>LPA<br>school day with EOtC >* school day without EOtC and PE (p< 0.001)<br>school day with EOtC >* school day with PE (p < 0.001)<br>school day with EOtC >* weekend day (p < 0.001) |



|                                              |                       |                                       |                                                                              |                    |                                                       |                                              |                                                  |                                                                         |                                                                                                                                                                                                                                                                                                                          |
|----------------------------------------------|-----------------------|---------------------------------------|------------------------------------------------------------------------------|--------------------|-------------------------------------------------------|----------------------------------------------|--------------------------------------------------|-------------------------------------------------------------------------|--------------------------------------------------------------------------------------------------------------------------------------------------------------------------------------------------------------------------------------------------------------------------------------------------------------------------|
| Sigmund et al.; 2014; Czechia                | Cross Sectional Study | N = 338; 9.91 years; m = 168; f = 170 | Changes in PA levels between the day with participation in PE and without PE | Physical Education | LPA<br>MVPA<br>SED<br><br>Accelerometer<br><br>7 days | Before school in school after school all day | p ≤ 0.05, ES: medium not supporting compensation | higher overall PA levels on day with PE compared to non PE day          | <p>school MVPA<br/>PEL &gt;* without PEL (p &lt; 0.005)</p> <p>daily MVPA<br/>PEL &gt;* without PEL (p girls &lt; 0.05), (p boys &lt; 0.005)</p> <p>school LPA<br/>PEL &gt;* without PEL (p girls &lt; 0.005), (p boys &lt; 0.01)</p> <p>daily SED<br/>PEL &lt;* without PEL (p girls &lt; 0.05), (p boys &lt; 0.01)</p> |
| Smith et al.; 2012; UK<br><br>SPEEDY - Study | longitudinal study    | N = 812; 9-10 years; m = 333; f = 479 | Association between change in mode of travel to school and change in PA      | ACS                | MVPA<br><br>Accelerometer<br><br>7 days               | total day weekday                            | p ≤ 0.05 not supporting compensation             | higher overall PA in children who changed from passive to active travel | <p>boys:<br/>change in total daily MVPA<br/>active to passive<br/>↓<br/>passive to active<br/>↑* (p= 0.03)</p> <p>girls:<br/>change in total daily MVPA<br/>active to passive ↓<br/>passive to active<br/>↑* (p&lt; 0.01)</p>                                                                                            |

Stewart et al.; 2017; New Zealand

Built Environment and Adolescent New Zealanders (BEANZ) – Study

Cross sectional study

N = 186; 14.07 years; m = 110; f = 76

Relationship between school travel mode and physical activity within various space-time domains

ACS

counts per minute MVPA Accelerometer 7 days

total day home school transport leisure

$p \leq 0.05$  not supporting compensation

higher overall PA in children with active transport (AT)  
higher transport PA is associated with higher leisure time PA

no active transport (noT)

Day MVPA AT >\* noT (p < 0.001)

Day SED AT < noT

Home MVPA AT = noT

Home SED AT = noT

School MVPA AT = noT

School SED AT = noT

Transport MVPA AT >\* noT (p < 0.001)

Transport SED AT <\* noT (p < 0.001)

Leisure MVPA AT >\* noT (p < 0.039)

Leisure SED AT <\* noT (p < 0.016)



|                                                     |             |                                       |     |                                                            |              |                                                      |         |                                                  |                                              |                                      |                            |                                                                       |
|-----------------------------------------------------|-------------|---------------------------------------|-----|------------------------------------------------------------|--------------|------------------------------------------------------|---------|--------------------------------------------------|----------------------------------------------|--------------------------------------|----------------------------|-----------------------------------------------------------------------|
| n.g.                                                |             |                                       |     |                                                            |              |                                                      |         |                                                  |                                              |                                      |                            |                                                                       |
| 568no intervention                                  |             |                                       |     |                                                            |              |                                                      |         |                                                  |                                              |                                      |                            |                                                                       |
| Toftager et al.; 2014; Denmark<br><br>SPACE - Study | Cluster RCT | N = 797; 12.5 years; m = 402; f = 395 | 376 | Effectivness of the intervention in reducing decline in PA | intervention | physiological changes and organizational environment | 2 years | MVPA total PA<br><br>Accelerometer<br><br>7 days | total day weekday weekend school time recess | overall PA ↔ supporting compensation | overall PA mainated stable | INT:<br>overall PA ↔<br>MVPA ↓<br>school PA ↓<br>Recess PA ↓<br>SED ↑ |
| n.g.                                                |             |                                       |     |                                                            |              |                                                      |         |                                                  |                                              |                                      |                            |                                                                       |
| n.g.                                                |             |                                       |     |                                                            |              |                                                      |         |                                                  |                                              |                                      |                            |                                                                       |
| 421no intervention                                  |             |                                       |     |                                                            |              |                                                      |         |                                                  |                                              |                                      |                            | CON:<br>overall PA ↓<br>MVPA ↓<br>school PA ↓<br>Recess PA ↓<br>SED ↑ |

|                                      |                       |                                       |                                                                      |                    |  |                     |                                                                                                     |                                                      |                                                                                    |                                                                                          |                                                                                  |
|--------------------------------------|-----------------------|---------------------------------------|----------------------------------------------------------------------|--------------------|--|---------------------|-----------------------------------------------------------------------------------------------------|------------------------------------------------------|------------------------------------------------------------------------------------|------------------------------------------------------------------------------------------|----------------------------------------------------------------------------------|
| <b>Trapp et al.; 2013; Australia</b> | Cross sectional Study | N = 884; 11.0 years; m = 384; f = 500 | Extent of travel mode to school was associated with PA               | ACS                |  | step counts         | weekend<br>weekday<br>leisure time                                                                  | p ≤ 0.05 not supporting compensation                 | higher overall PA in children who walk compared to children who travelled with car | steps on weekday WALK >* CAR (p < 0.001)                                                 | after adjusting for demographic factors Steps WALK >* CAR (p < 0.000)            |
|                                      |                       |                                       |                                                                      |                    |  | Pedometer<br>7 days |                                                                                                     |                                                      |                                                                                    | Participation in leisure activities WALK >* CAR (p < 0.05 for girls; p < 0.001 for boys) | Participation in leisure activities WALK >* CAR (p < 0.043) for girls WALK = CAR |
| <b>Tudor Locke et al.; 2006; USA</b> | Cross sectional study | N = 81; 11.8 years; m = 28; f = 53    | Differences in step counts on PE and non PE day in different domains | Physical Education |  | step counts         | Total day<br>Before school<br>After School<br>Lunchtime<br>Recess<br>PE<br>After school<br>Residual | PE day = non PE day supporting compensation in girls | overall PA levels on day with PE and without PE similar in girls                   | boys: steps<br>PE day >* non PE day (p < 0.05)                                           | girls steps<br>PE day = non PE day                                               |
|                                      |                       |                                       |                                                                      |                    |  | Pedometer<br>4 days |                                                                                                     | p ≤ 0.05 not supporting compensation in boys         |                                                                                    |                                                                                          |                                                                                  |

|                                    |                                                                                |                       |                                    |                                                                                                                      |                    |                             |                   |                                      |                                                                 |                                                                                 |
|------------------------------------|--------------------------------------------------------------------------------|-----------------------|------------------------------------|----------------------------------------------------------------------------------------------------------------------|--------------------|-----------------------------|-------------------|--------------------------------------|-----------------------------------------------------------------|---------------------------------------------------------------------------------|
| <b>Vale et al.; 2011; Portugal</b> | Preschool Physical Activity, Body Composition and Lifestyle - Study (PRESTYLE) | Cross sectional Study | N = 193; 4.8 years; m = 97; f = 96 | Differences in PA during daily school hours when they attend PE classes compared with school days without PE classes | Physical Education | total PA MVPA Accelerometer | PE day non PE day | p ≤ 0.05 not supporting compensation | overall PA levels higher on days with PE compared to non-PE day | TPA PE day >* non PE day (p < 0.05)<br><br>MVPA PE day >* non PE-day (p < 0.05) |
|                                    |                                                                                |                       |                                    |                                                                                                                      |                    | 5 days                      |                   |                                      |                                                                 |                                                                                 |

|                                              |                       |                                     |                                                                                                         |                                   |                                  |                                |                                      |                                                                                                                                                      |                                                                                                                                               |                                                                                                    |
|----------------------------------------------|-----------------------|-------------------------------------|---------------------------------------------------------------------------------------------------------|-----------------------------------|----------------------------------|--------------------------------|--------------------------------------|------------------------------------------------------------------------------------------------------------------------------------------------------|-----------------------------------------------------------------------------------------------------------------------------------------------|----------------------------------------------------------------------------------------------------|
| <b>Van Cauwenbergh et al.; 2013; Belgium</b> | Cross Sectional Study | N = 200; 5.3 years; m = 87; f = 113 | Comparison of PA levels on days with Teacher led structured PA session with days without these sessions | teacher led structured PA session | LPA MVPA LMVPA SED Accelerometer | Preschool time after preschool | p ≤ 0.05 not supporting compensation | higher PA during school day on PE day<br><br>similar afterschool PA levels on day with and without PE<br><br>higher overall PA levels on day with PE | Preschool time SED PE day >* without ( PE p < 0.001)<br><br>LPA PE day >* without PE (p < 0.001)<br><br>MVPA PE day >* without PE (p < 0.001) | After Preschool time SED PE day = without<br><br>LPA PE day = without<br><br>MVPA PE day = without |
|                                              |                       |                                     |                                                                                                         |                                   | 4 days                           |                                |                                      |                                                                                                                                                      |                                                                                                                                               |                                                                                                    |

|                                |                   |                            |                                                                                           |              |                             |        |                          |                    |                                              |                                                                                               |                                                                                                          |                                        |  |  |        |
|--------------------------------|-------------------|----------------------------|-------------------------------------------------------------------------------------------|--------------|-----------------------------|--------|--------------------------|--------------------|----------------------------------------------|-----------------------------------------------------------------------------------------------|----------------------------------------------------------------------------------------------------------|----------------------------------------|--|--|--------|
| Wilson et al.; 2017; Australia | Cross over design | N = 51 (all m); 12.4 years | impact of 10min active lesson breaks on PA on other day segments and across the whole day | intervention | active school lesson breaks | 1 week | 40min/day 3 times a week | MPA<br>VPA<br>MVPA | total day school hours<br>ALB<br>afterschool | p ≤ 0.05 ↑ in school MVPA, ↓ afterschool MVPA<br>daily MVPA INT = CON supporting compensation | higher inschool PA is compensated in less out of school PA overall PA levels similar between INT and CON | daily MVPA<br>INT = CON                |  |  |        |
|                                |                   |                            |                                                                                           |              |                             |        |                          | Accelerometer      |                                              |                                                                                               |                                                                                                          | daily VPA<br>INT >* CON (p=0.006)      |  |  |        |
|                                |                   |                            |                                                                                           |              |                             |        |                          |                    |                                              |                                                                                               |                                                                                                          | daily MPA<br>INT < CON                 |  |  |        |
|                                |                   |                            |                                                                                           |              |                             |        |                          |                    |                                              |                                                                                               |                                                                                                          | inschool MVPA<br>INT >* CON (p<0.0001) |  |  |        |
|                                |                   |                            |                                                                                           |              |                             |        |                          |                    |                                              |                                                                                               |                                                                                                          |                                        |  |  | 7 days |

(n.g. = not given in the study)

Abbreviation List

- CON Control group
- CPM Counts per minute
- EE Energy Expenditure
- ES Effect Size
- INT Intervention group
- LPA Light physical activity
- MVPA Moderate-to-vigorous physical activity
- PA Physical activity
- PE Physical Education
- RCT Randomized controlled trial
- SED Sedentary behavior

|     |                            |
|-----|----------------------------|
| ST  | Screen time                |
| TPA | Total physical activity    |
| VPA | Vigorous physical activity |
